# Supplementary material for: Active versus passive adverse event reporting after pediatric chiropractic manual therapy: study protocol for a cluster randomized controlled trial
Source: Springer Nature journal article supplement (doi:10.1186/s13063-017-2301-0), 2017-12-01
Supplement: MOESM3 [file 15272270]

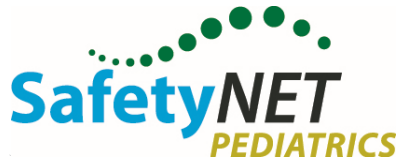

### **SafetyNET Patient Information Sheet - Pediatric**

**Title of Study:** Improving the Assessment of Safety in Pediatric Chiropractic Manual Therapy

#### **Investigators:**

Dr. Katherine Pohlman (780-342-8447)

Dr. Sunita Vohra (780-342-8592)

Dr. Linda Carroll (780-492-9767)

#### **Why is your child being asked to take part in this research study?**

Your child is being asked to take part in this research study being done with the University of Alberta because your chiropractor is a research participant in this study. The purpose of the study is to collect information related to children patient's experience of chiropractic manual therapy, including safety information. Your participation is voluntary and completion / return of the form means you agree to be part of this study.

#### **What is the reason for doing the study?**

The study is being done to support patient safety which will allow doctors of chiropractic to identify concerns and find ways to reduce them.

#### **What will I be asked to do?**

If you agree to take part on behalf of your child, we will ask you to complete 2 forms about your child's visit with your chiropractor today. The forms will only take a few minutes to fill out. The PRE form will be completed before your child sees the chiropractor. The POST form will ask you to comment on any effects / problems / symptoms your child may have experienced during or after his / her treatment. This form can be completed and returned at any time, using the pre-addressed and postage paid envelope; however, we are most interested in your feedback one week after your child's visit, but prior to your child's next visit with this chiropractor.

#### **What are the risks and discomforts?**

There are no known risks associated with participating in this study.

**What are the benefits to me?**

You and your child are not expected to get any benefit from being in this research study. The benefits of taking part are to help increase our knowledge about the potential effects and safety of chiropractic manual therapy.

**Do I have to take part in the study?**

Being in this study is your choice. If you decide your child should be in the study, you can change your mind and stop being in the study at any time, and it will not affect you or your child's treatment. No one, including the researcher, will know whether or not you have participated.

**Will my information be kept private?**

During the study, if you choose to complete the forms on behalf of your child, we will collect data about the care he or she received from your chiropractor. We will do everything we can to make sure that this data is kept private. No data relating to this study includes your child's name. Sometimes, by law, we may have to release our data and the information you provided, so we cannot guarantee absolute privacy. However, we will make every legal effort to make sure that your child's information is kept private. Furthermore, your chiropractor identified by a code, rather than by name, and this identifying code will be destroyed 90 days after their participation in the study. After that time, we will not have any record of who took part in the study. Thus, we will not be able to connect your chiropractor to any of your child's visit after this time.

**What if I have questions?**

If you have concerns about this research now or later, please contact the study coordinator, Dr. Katie Pohlman at 780-342-8447. If you have any questions regarding your rights as a research participant, you may contact the Health Research Ethics Board at 780-492-2615. This office has no affiliation with the study investigators.

**Thank you for your support.  
Your feedback is extremely valuable.**

Completing this form means you agree to be part of this study. Please give to your chiropractor before your visit starts.

① This form is being completed for this child by:  Mother  Father  Other, specify: \_\_\_\_\_

② Please mark the reason(s) for your child's appointment today:

Preventative / Wellness / No Symptoms     Headache     Neck pain     Mid-back pain  
 Low-back pain     Arm / Shoulder / Knee / Leg Pain     ADD / ADHD     Autism  
 Breastfeeding Difficulties     Cold     Colic     Digestive Issues     Plagiocephaly  
 Torticollis     Other, specify: \_\_\_\_\_

③ How long has your child had this condition? \_\_\_\_\_ week(s)     >1 year     N/A

④ How many treatments has your child had for this condition? \_\_\_\_\_ treatments     N/A

Over what period of time? \_\_\_\_\_ week(s)     >1 year     N/A

⑤ In the past 7 days, how would you rate your child's pain on average?

|                          |                          |                          |                          |                          |                          |                          |                          |                          |                          |                          |
|--------------------------|--------------------------|--------------------------|--------------------------|--------------------------|--------------------------|--------------------------|--------------------------|--------------------------|--------------------------|--------------------------|
| 0                        | 1                        | 2                        | 3                        | 4                        | 5                        | 6                        | 7                        | 8                        | 9                        | 10                       |
| <input type="checkbox"/> | <input type="checkbox"/> | <input type="checkbox"/> | <input type="checkbox"/> | <input type="checkbox"/> | <input type="checkbox"/> | <input type="checkbox"/> | <input type="checkbox"/> | <input type="checkbox"/> | <input type="checkbox"/> | <input type="checkbox"/> |
| No pain                  |                          |                          |                          |                          | Worst imaginable pain    |                          |                          |                          |                          |                          |

⑥ Please indicate any medications that your child is taking:  None

Acetaminophen / Ibuprofen     Cetirizine (Zyrtec/Reactine)     Diflucan     Gaviscon  
 Omeprazole (Prilosec, Losec)     Ranitidine (Zantac)     Other: \_\_\_\_\_

⑦ Please indicate any vitamins or natural health products that your child is taking:  None

Omega-3     Probiotics     Vitamin D     Other: \_\_\_\_\_

⑧ Does your child have a history of any of the following?  None

Bleeding disorder     Cancer     Diabetes     Other: \_\_\_\_\_

⑨ Child is:  Male     Female     Other: \_\_\_\_\_

⑩ Child's date of birth? \_\_\_\_ Month \_\_\_\_ Day 20\_\_\_\_

⑪ Today's fees covered by:  N/A     Self-pay     Car Accident Coverage     Other Insurance: \_\_\_\_\_

**Please continue with questions on the back.**

| First:<br>Does your child have any of the following?<br>(check all that apply) | Second: For each item checked, please answer the questions below |                                                                          |                                                                                      |
|--------------------------------------------------------------------------------|------------------------------------------------------------------|--------------------------------------------------------------------------|--------------------------------------------------------------------------------------|
|                                                                                | How long has your child had it?                                  | Does it interfere with their usual daily activities (e.g. play, school)? | Does it limit their ability to care for themselves (e.g. bathing, dressing, eating)? |
| <input type="radio"/> Discomfort / Pain                                        | _____ week(s) <input type="radio"/> >1 year                      | <input type="radio"/> Yes <input type="radio"/> No                       | <input type="radio"/> Yes <input type="radio"/> No                                   |
| <input type="radio"/> Stiffness                                                | _____ week(s) <input type="radio"/> >1 year                      | <input type="radio"/> Yes <input type="radio"/> No                       | <input type="radio"/> Yes <input type="radio"/> No                                   |
| <input type="radio"/> Weakness                                                 | _____ week(s) <input type="radio"/> >1 year                      | <input type="radio"/> Yes <input type="radio"/> No                       | <input type="radio"/> Yes <input type="radio"/> No                                   |
| <input type="radio"/> Fatigue / Tiredness                                      | _____ week(s) <input type="radio"/> >1 year                      | <input type="radio"/> Yes <input type="radio"/> No                       | <input type="radio"/> Yes <input type="radio"/> No                                   |
| <input type="radio"/> Headache                                                 | _____ week(s) <input type="radio"/> >1 year                      | <input type="radio"/> Yes <input type="radio"/> No                       | <input type="radio"/> Yes <input type="radio"/> No                                   |
| <input type="radio"/> Dizziness                                                | _____ week(s) <input type="radio"/> >1 year                      | <input type="radio"/> Yes <input type="radio"/> No                       | <input type="radio"/> Yes <input type="radio"/> No                                   |
| <input type="radio"/> Numbness / Tingling                                      | _____ week(s) <input type="radio"/> >1 year                      | <input type="radio"/> Yes <input type="radio"/> No                       | <input type="radio"/> Yes <input type="radio"/> No                                   |
| <input type="radio"/> Problems Sleeping                                        | _____ week(s) <input type="radio"/> >1 year                      | <input type="radio"/> Yes <input type="radio"/> No                       | <input type="radio"/> Yes <input type="radio"/> No                                   |
| <input type="radio"/> Irritability / Crying                                    | _____ week(s) <input type="radio"/> >1 year                      | <input type="radio"/> Yes <input type="radio"/> No                       | <input type="radio"/> Yes <input type="radio"/> No                                   |
| <input type="radio"/> Other: _____                                             | _____ week(s) <input type="radio"/> >1 year                      | <input type="radio"/> Yes <input type="radio"/> No                       | <input type="radio"/> Yes <input type="radio"/> No                                   |
| <input type="radio"/> None of the above                                        |                                                                  |                                                                          |                                                                                      |

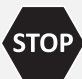

Please give the form to the **CHIROPRACTOR**, who will complete the remainder *below*:

① Radicular Pain?  Yes  No ② Please indicate if the main condition is:  Chronic  Acute  Recurring  NA

| TREATMENT          | Cervical Spine                                                           | Thoracic Spine                                                           | Lumbar Spine                                                             | Sacrum / Pelvis                                                          | Upper Extremity                                                          | Lower Extremity                                                          | Other *                                                                  |
|--------------------|--------------------------------------------------------------------------|--------------------------------------------------------------------------|--------------------------------------------------------------------------|--------------------------------------------------------------------------|--------------------------------------------------------------------------|--------------------------------------------------------------------------|--------------------------------------------------------------------------|
| # of Manipulations | <input type="radio"/> 1 <input type="radio"/> 2 <input type="radio"/> 3+ | <input type="radio"/> 1 <input type="radio"/> 2 <input type="radio"/> 3+ | <input type="radio"/> 1 <input type="radio"/> 2 <input type="radio"/> 3+ | <input type="radio"/> 1 <input type="radio"/> 2 <input type="radio"/> 3+ | <input type="radio"/> 1 <input type="radio"/> 2 <input type="radio"/> 3+ | <input type="radio"/> 1 <input type="radio"/> 2 <input type="radio"/> 3+ | <input type="radio"/> 1 <input type="radio"/> 2 <input type="radio"/> 3+ |
| # of Mobilizations | <input type="radio"/> 1 <input type="radio"/> 2 <input type="radio"/> 3+ | <input type="radio"/> 1 <input type="radio"/> 2 <input type="radio"/> 3+ | <input type="radio"/> 1 <input type="radio"/> 2 <input type="radio"/> 3+ | <input type="radio"/> 1 <input type="radio"/> 2 <input type="radio"/> 3+ | <input type="radio"/> 1 <input type="radio"/> 2 <input type="radio"/> 3+ | <input type="radio"/> 1 <input type="radio"/> 2 <input type="radio"/> 3+ | <input type="radio"/> 1 <input type="radio"/> 2 <input type="radio"/> 3+ |
| Mechanical Device  | <input type="radio"/> 1 <input type="radio"/> 2 <input type="radio"/> 3+ | <input type="radio"/> 1 <input type="radio"/> 2 <input type="radio"/> 3+ | <input type="radio"/> 1 <input type="radio"/> 2 <input type="radio"/> 3+ | <input type="radio"/> 1 <input type="radio"/> 2 <input type="radio"/> 3+ | <input type="radio"/> 1 <input type="radio"/> 2 <input type="radio"/> 3+ | <input type="radio"/> 1 <input type="radio"/> 2 <input type="radio"/> 3+ | <input type="radio"/> 1 <input type="radio"/> 2 <input type="radio"/> 3+ |
| Other Manual Tx*   | <input type="radio"/> 1 <input type="radio"/> 2 <input type="radio"/> 3+ | <input type="radio"/> 1 <input type="radio"/> 2 <input type="radio"/> 3+ | <input type="radio"/> 1 <input type="radio"/> 2 <input type="radio"/> 3+ | <input type="radio"/> 1 <input type="radio"/> 2 <input type="radio"/> 3+ | <input type="radio"/> 1 <input type="radio"/> 2 <input type="radio"/> 3+ | <input type="radio"/> 1 <input type="radio"/> 2 <input type="radio"/> 3+ | <input type="radio"/> 1 <input type="radio"/> 2 <input type="radio"/> 3+ |
| Other Non-Man. Tx* | <input type="radio"/> 1 <input type="radio"/> 2 <input type="radio"/> 3+ | <input type="radio"/> 1 <input type="radio"/> 2 <input type="radio"/> 3+ | <input type="radio"/> 1 <input type="radio"/> 2 <input type="radio"/> 3+ | <input type="radio"/> 1 <input type="radio"/> 2 <input type="radio"/> 3+ | <input type="radio"/> 1 <input type="radio"/> 2 <input type="radio"/> 3+ | <input type="radio"/> 1 <input type="radio"/> 2 <input type="radio"/> 3+ | <input type="radio"/> 1 <input type="radio"/> 2 <input type="radio"/> 3+ |

\*Other, (specify) \_\_\_\_\_

### POST SYMPTOMS

Was there any adverse event after the manual therapy treatment?  No  Yes (complete table below)

| Post Symptoms<br>(check all that apply)     | Pre-Existing:                                      | If Yes:<br>Better,<br>Worse, or<br>Unchanged?                           | Anticipated?                                       | Overall Severity Rating                                                                                              |
|---------------------------------------------|----------------------------------------------------|-------------------------------------------------------------------------|----------------------------------------------------|----------------------------------------------------------------------------------------------------------------------|
| <input type="radio"/> Discomfort / Pain     | <input type="radio"/> Yes <input type="radio"/> No | <input type="radio"/> B <input type="radio"/> W <input type="radio"/> U | <input type="radio"/> Yes <input type="radio"/> No | <input type="radio"/> Mild <input type="radio"/> Moderate <input type="radio"/> Severe <input type="radio"/> Serious |
| <input type="radio"/> Stiffness             | <input type="radio"/> Yes <input type="radio"/> No | <input type="radio"/> B <input type="radio"/> W <input type="radio"/> U | <input type="radio"/> Yes <input type="radio"/> No | <input type="radio"/> Mild <input type="radio"/> Moderate <input type="radio"/> Severe <input type="radio"/> Serious |
| <input type="radio"/> Weakness              | <input type="radio"/> Yes <input type="radio"/> No | <input type="radio"/> B <input type="radio"/> W <input type="radio"/> U | <input type="radio"/> Yes <input type="radio"/> No | <input type="radio"/> Mild <input type="radio"/> Moderate <input type="radio"/> Severe <input type="radio"/> Serious |
| <input type="radio"/> Fatigue / Tiredness   | <input type="radio"/> Yes <input type="radio"/> No | <input type="radio"/> B <input type="radio"/> W <input type="radio"/> U | <input type="radio"/> Yes <input type="radio"/> No | <input type="radio"/> Mild <input type="radio"/> Moderate <input type="radio"/> Severe <input type="radio"/> Serious |
| <input type="radio"/> Headache              | <input type="radio"/> Yes <input type="radio"/> No | <input type="radio"/> B <input type="radio"/> W <input type="radio"/> U | <input type="radio"/> Yes <input type="radio"/> No | <input type="radio"/> Mild <input type="radio"/> Moderate <input type="radio"/> Severe <input type="radio"/> Serious |
| <input type="radio"/> Dizziness             | <input type="radio"/> Yes <input type="radio"/> No | <input type="radio"/> B <input type="radio"/> W <input type="radio"/> U | <input type="radio"/> Yes <input type="radio"/> No | <input type="radio"/> Mild <input type="radio"/> Moderate <input type="radio"/> Severe <input type="radio"/> Serious |
| <input type="radio"/> Numbness / Tingling   | <input type="radio"/> Yes <input type="radio"/> No | <input type="radio"/> B <input type="radio"/> W <input type="radio"/> U | <input type="radio"/> Yes <input type="radio"/> No | <input type="radio"/> Mild <input type="radio"/> Moderate <input type="radio"/> Severe <input type="radio"/> Serious |
| <input type="radio"/> Irritability / Crying | <input type="radio"/> Yes <input type="radio"/> No | <input type="radio"/> B <input type="radio"/> W <input type="radio"/> U | <input type="radio"/> Yes <input type="radio"/> No | <input type="radio"/> Mild <input type="radio"/> Moderate <input type="radio"/> Severe <input type="radio"/> Serious |
| <input type="radio"/> Other: _____          | <input type="radio"/> Yes <input type="radio"/> No | <input type="radio"/> B <input type="radio"/> W <input type="radio"/> U | <input type="radio"/> Yes <input type="radio"/> No | <input type="radio"/> Mild <input type="radio"/> Moderate <input type="radio"/> Severe <input type="radio"/> Serious |

Please put completed form in SafetyNET Box.

**Thank you for your support.  
Your feedback is extremely valuable.**

- ❖ Completion and return of this form means you agree to be part of this study on behalf of this child.  
Please answer the questions based upon the appointment date identified below.
- ❖ You can complete this survey at any time; however, we are most interested in the feedback **one week after your child's visit, but before his / her next visit.**

① Date of completion: \_\_\_\_ / \_\_\_\_ / 201\_\_\_\_ (Month / Day / Year)

② This form is being completed for this child by:     Mother     Father     Other: \_\_\_\_\_

|                                                                                                  | Very satisfied        | Somewhat satisfied    | Neither satisfied nor dissatisfied | Somewhat dissatisfied | Very dissatisfied     |
|--------------------------------------------------------------------------------------------------|-----------------------|-----------------------|------------------------------------|-----------------------|-----------------------|
| <i>Mark only one checkbox on each line</i>                                                       |                       |                       |                                    |                       |                       |
| ③ How satisfied are you with the information you have been given from your child's chiropractor? | <input type="radio"/> | <input type="radio"/> | <input type="radio"/>              | <input type="radio"/> | <input type="radio"/> |
| ④ How satisfied are you with the treatment(s) that your child received?                          | <input type="radio"/> | <input type="radio"/> | <input type="radio"/>              | <input type="radio"/> | <input type="radio"/> |
| ⑤ How satisfied are you with the overall care that your child received?                          | <input type="radio"/> | <input type="radio"/> | <input type="radio"/>              | <input type="radio"/> | <input type="radio"/> |

⑥ In the past 7 days, how would you rate your child's pain on average?

|                          |                          |                          |                          |                          |                          |                          |                          |                          |                          |                          |
|--------------------------|--------------------------|--------------------------|--------------------------|--------------------------|--------------------------|--------------------------|--------------------------|--------------------------|--------------------------|--------------------------|
| 0                        | 1                        | 2                        | 3                        | 4                        | 5                        | 6                        | 7                        | 8                        | 9                        | 10                       |
| <input type="checkbox"/> | <input type="checkbox"/> | <input type="checkbox"/> | <input type="checkbox"/> | <input type="checkbox"/> | <input type="checkbox"/> | <input type="checkbox"/> | <input type="checkbox"/> | <input type="checkbox"/> | <input type="checkbox"/> | <input type="checkbox"/> |
| No pain                  |                          |                          |                          |                          |                          |                          |                          |                          |                          | Worst imaginable pain    |

⑦ During the appointment with the chiropractor, did your child receive **manual therapy** (also called manipulation, mobilization or adjustment; defined as 'A hands-on therapy to affect joints in the neck, back or limbs; sometimes hand-held mechanical devices are also used.'):

**No**

**Yes**, please mark all areas where you received a manual therapy:

Neck     Back     Shoulder/Arms/Knee/Legs     Other: \_\_\_\_\_

⑧ Since your child's appointment with the chiropractor, what other treatments / therapies has your child had?

None

Other **manual therapy** (also called manipulation, mobilization or adjustment; defined as 'A hands-on therapy to affect joints in the neck, back or limbs; sometimes hand-held mechanical devices are also used.')

    please specify: \_\_\_\_\_

New medicine, please specify: \_\_\_\_\_

New natural health products, please specify: \_\_\_\_\_

Other, please specify: \_\_\_\_\_

⑨ How would you describe the overall effect of your child's visit with your chiropractor?

Favorable     Unfavorable     None     Unsure

**Please complete page 2 (on reverse)**

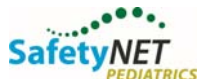

1

**FIRST:** Since the appointment did your child have any of the following?

(check all that apply below)

**SECOND:**

For each item you checked 'yes' in the first column, please answer the questions *below*.

|                            | 2                                                     | 3                                                                                                                                            | 4                                                                              | 5                                                                                         | 6                                                          | 7                                                     | 8                                              | 9                                                       |                                                       |                                                       |
|----------------------------|-------------------------------------------------------|----------------------------------------------------------------------------------------------------------------------------------------------|--------------------------------------------------------------------------------|-------------------------------------------------------------------------------------------|------------------------------------------------------------|-------------------------------------------------------|------------------------------------------------|---------------------------------------------------------|-------------------------------------------------------|-------------------------------------------------------|
|                            | Did you expect this to occur in your child?           | If symptom was there before treatment, is it now: <b>B</b> etter, or <b>W</b> orse, <b>U</b> nchanged or <b>N</b> ot there before treatment? | Did it interfere with your child's usual daily activities (e.g. work, school)? | Did it limit your child's ability to care for them self (e.g. bathing, dressing, eating)? | Did your child need to see a medical doctor because of it? | Was your child admitted to hospital because of it?    | How many hours after the therapy did it start? | How long did it last? (check 'C' if it still continues) | If 'C', is your child currently being treated for it? |                                                       |
| <b>Discomfort/Pain</b>     | <input type="radio"/> Yes<br><input type="radio"/> No | <input type="radio"/> B <input type="radio"/> W <input type="radio"/> U <input type="radio"/> N                                              | <input type="radio"/> Yes<br><input type="radio"/> No                          | <input type="radio"/> Yes<br><input type="radio"/> No                                     | <input type="radio"/> Yes<br><input type="radio"/> No      | <input type="radio"/> Yes<br><input type="radio"/> No | _____ hour(s)                                  | _____ hour(s)                                           | <input type="radio"/> C                               | <input type="radio"/> Yes<br><input type="radio"/> No |
| <b>Stiffness</b>           | <input type="radio"/> Yes<br><input type="radio"/> No | <input type="radio"/> B <input type="radio"/> W <input type="radio"/> U <input type="radio"/> N                                              | <input type="radio"/> Yes<br><input type="radio"/> No                          | <input type="radio"/> Yes<br><input type="radio"/> No                                     | <input type="radio"/> Yes<br><input type="radio"/> No      | <input type="radio"/> Yes<br><input type="radio"/> No | _____ hour(s)                                  | _____ hour(s)                                           | <input type="radio"/> C                               | <input type="radio"/> Yes<br><input type="radio"/> No |
| <b>Weakness</b>            | <input type="radio"/> Yes<br><input type="radio"/> No | <input type="radio"/> B <input type="radio"/> W <input type="radio"/> U <input type="radio"/> N                                              | <input type="radio"/> Yes<br><input type="radio"/> No                          | <input type="radio"/> Yes<br><input type="radio"/> No                                     | <input type="radio"/> Yes<br><input type="radio"/> No      | <input type="radio"/> Yes<br><input type="radio"/> No | _____ hour(s)                                  | _____ hour(s)                                           | <input type="radio"/> C                               | <input type="radio"/> Yes<br><input type="radio"/> No |
| <b>Tiredness/Fatigue</b>   | <input type="radio"/> Yes<br><input type="radio"/> No | <input type="radio"/> B <input type="radio"/> W <input type="radio"/> U <input type="radio"/> N                                              | <input type="radio"/> Yes<br><input type="radio"/> No                          | <input type="radio"/> Yes<br><input type="radio"/> No                                     | <input type="radio"/> Yes<br><input type="radio"/> No      | <input type="radio"/> Yes<br><input type="radio"/> No | _____ hour(s)                                  | _____ hour(s)                                           | <input type="radio"/> C                               | <input type="radio"/> Yes<br><input type="radio"/> No |
| <b>Headache</b>            | <input type="radio"/> Yes<br><input type="radio"/> No | <input type="radio"/> B <input type="radio"/> W <input type="radio"/> U <input type="radio"/> N                                              | <input type="radio"/> Yes<br><input type="radio"/> No                          | <input type="radio"/> Yes<br><input type="radio"/> No                                     | <input type="radio"/> Yes<br><input type="radio"/> No      | <input type="radio"/> Yes<br><input type="radio"/> No | _____ hour(s)                                  | _____ hour(s)                                           | <input type="radio"/> C                               | <input type="radio"/> Yes<br><input type="radio"/> No |
| <b>Dizziness</b>           | <input type="radio"/> Yes<br><input type="radio"/> No | <input type="radio"/> B <input type="radio"/> W <input type="radio"/> U <input type="radio"/> N                                              | <input type="radio"/> Yes<br><input type="radio"/> No                          | <input type="radio"/> Yes<br><input type="radio"/> No                                     | <input type="radio"/> Yes<br><input type="radio"/> No      | <input type="radio"/> Yes<br><input type="radio"/> No | _____ hour(s)                                  | _____ hour(s)                                           | <input type="radio"/> C                               | <input type="radio"/> Yes<br><input type="radio"/> No |
| <b>Numbness/Tingling</b>   | <input type="radio"/> Yes<br><input type="radio"/> No | <input type="radio"/> B <input type="radio"/> W <input type="radio"/> U <input type="radio"/> N                                              | <input type="radio"/> Yes<br><input type="radio"/> No                          | <input type="radio"/> Yes<br><input type="radio"/> No                                     | <input type="radio"/> Yes<br><input type="radio"/> No      | <input type="radio"/> Yes<br><input type="radio"/> No | _____ hour(s)                                  | _____ hour(s)                                           | <input type="radio"/> C                               | <input type="radio"/> Yes<br><input type="radio"/> No |
| <b>Problems Sleeping</b>   | <input type="radio"/> Yes<br><input type="radio"/> No | <input type="radio"/> B <input type="radio"/> W <input type="radio"/> U <input type="radio"/> N                                              | <input type="radio"/> Yes<br><input type="radio"/> No                          | <input type="radio"/> Yes<br><input type="radio"/> No                                     | <input type="radio"/> Yes<br><input type="radio"/> No      | <input type="radio"/> Yes<br><input type="radio"/> No | _____ hour(s)                                  | _____ hour(s)                                           | <input type="radio"/> C                               | <input type="radio"/> Yes<br><input type="radio"/> No |
| <b>Irritability/Crying</b> | <input type="radio"/> Yes<br><input type="radio"/> No | <input type="radio"/> B <input type="radio"/> W <input type="radio"/> U <input type="radio"/> N                                              | <input type="radio"/> Yes<br><input type="radio"/> No                          | <input type="radio"/> Yes<br><input type="radio"/> No                                     | <input type="radio"/> Yes<br><input type="radio"/> No      | <input type="radio"/> Yes<br><input type="radio"/> No | _____ hour(s)                                  | _____ hour(s)                                           | <input type="radio"/> C                               | <input type="radio"/> Yes<br><input type="radio"/> No |
| <b>Other Condition</b>     | <input type="radio"/> Yes<br><input type="radio"/> No | <input type="radio"/> B <input type="radio"/> W <input type="radio"/> U <input type="radio"/> N                                              | <input type="radio"/> Yes<br><input type="radio"/> No                          | <input type="radio"/> Yes<br><input type="radio"/> No                                     | <input type="radio"/> Yes<br><input type="radio"/> No      | <input type="radio"/> Yes<br><input type="radio"/> No | _____ hour(s)                                  | _____ hour(s)                                           | <input type="radio"/> C                               | <input type="radio"/> Yes<br><input type="radio"/> No |

Thank you for participating in the SafetyNET study. Please seal in envelope provided and place in mail.

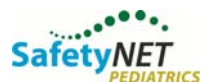

**Complete ONLY for Moderate, Severe or Serious Adverse Events**

- ❖ Please fax completed forms to: **214-902-2482**
- ❖ Completion of this form does not replace your usual communication with your insurance group.

**GENERAL ADVERSE EVENT NARRATIVE**

① Please describe what happened. (Include date of onset, manual therapy technique / location, treatment schedule, patient's response, tests done to evaluate the symptoms, and all actions taken.)

② How long after treatment did the adverse event occur?: \_\_\_\_\_ Hours OR \_\_\_\_\_ Days

③ In your opinion, what may have contributed to the adverse event?  
\_\_\_\_\_  
\_\_\_\_\_  
\_\_\_\_\_

**PATIENT CHARACTERISTICS Please describe what was known *PRIOR TO* treatment**

④ Reason of patient visit: \_\_\_\_\_

⑤ What was patient's specific diagnosis for treatment? (Include details such as acute / chronic / recurring, what symptoms they had, and what diagnostic tests were done prior to treatment.)  
\_\_\_\_\_  
\_\_\_\_\_  
\_\_\_\_\_  
\_\_\_\_\_

⑥ Has the patient experienced an adverse event to manual therapy in the past?  
 Yes     No     Unknown     **If yes, please specify** \_\_\_\_\_

**Please continue with questions on the back.**

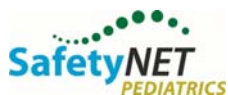

**PATIENT CHARACTERISTICS con't** – Please describe what was known *PRIOR TO* treatment

7 Did the patient have any other diagnoses?  
 Yes     No     Unknown     **If yes, please specify:** \_\_\_\_\_

8 Were you aware if the patient had any of the following conditions **prior to treatment**?  
 Acute infection                       Fracture                                       Recent relevant trauma  
 Bleeding tendency                       History of cancer                               Recent upper respiratory infection  
 Connective tissue disorder               History of stroke                               Vertigo  
 Diabetes                                       Prior spine surgeries                               Fever  
 Radiculopathy                               Other \_\_\_\_\_

9 Please check medication(s) or natural health product(s) the patient was taking **prior to treatment**.

- Prescription Medications**
- Don't Know
  - Acetaminophen / Ibuprofen
  - Ceririzine (Zyrtec)
  - Diflucan
  - Gaviscon
  - Omerprzole (Prolosec, Losec)
  - Ranitidine (Zantac)
  - Other, Specify \_\_\_\_\_

- Natural Health Products**
- Don't Know
  - Omega 3 Fatty Acids
  - Probiotics
  - Vitamin D
  - Other NHP, Specify:  
\_\_\_\_\_  
\_\_\_\_\_

**OUTCOME** (from your perspective / awareness)

**PATIENT IMPACT:**

10 What activities of daily living were affected? \_\_\_\_\_

11 Was self-care affected?                       Yes     No     Unknown

12 Was the patient hospitalized?               Yes     No     Unknown

13 Describe any residual effect / permanent disability / death: \_\_\_\_\_

14 Did the adverse event require treatment?     Yes     No     Unknown

15 Has the adverse event resolved?               Yes     No     Unknown

**If Yes, Date of Resolution (dd/mm/yyyy)**    \_\_\_\_ \_\_\_\_ / \_\_\_\_ \_\_\_\_ / 201 \_\_\_\_

**PROVIDER IMPACT:**

16 Has this event caused you to make any changes to your practice?               Yes     No

**If Yes, describe:** \_\_\_\_\_

17 Were there factors that could have minimized / prevented this event?               Yes     No

**If Yes, describe:** \_\_\_\_\_
