# Supplementary material for: Active versus passive adverse event reporting after pediatric chiropractic manual therapy: study protocol for a cluster randomized controlled trial
Source: Springer Nature journal article supplement (doi:10.1186/s13063-017-2301-0), 2017-12-01
Supplement: MOESM4 [file 15272270]

A large, glossy red sphere with a white highlight at the top and a soft shadow below it.

**Incidents  
that have  
occurred**

A large, glossy yellow sphere with a white highlight at the top and a soft shadow below it.

**Incidents  
that almost  
occurred  
(near miss)**

A large, glossy green sphere with a white highlight at the top and a soft shadow below it.

**Incidents  
that could  
occur**

## CPiRLS Trigger List

The trigger list below is designed to help you participate in CPiRLS by providing examples of incidents that you might experience and should report. Some incidents may be fairly common while some may be extremely rare. The list is not exhaustive but provides the categories/subcategories of incident that match those examples listed in the online reporting form. These same categories/subcategories can be applied to near misses and potential incidents on the understanding that you are referring to the *avoidance* of the incident or an *identified risk* of a particular incident occurring.

| <b>DOCUMENTATION</b>                                              | <b>EXAMINATION/<br/>ASSESSMENT</b>                  | <b>TREATMENT/<br/>MANAGEMENT</b>                                                                 | <b>ACCIDENTS/<br/>EQUIPMENT/<br/>INFRASTRUCTURE</b>           |
|-------------------------------------------------------------------|-----------------------------------------------------|--------------------------------------------------------------------------------------------------|---------------------------------------------------------------|
| Patient record inadequate                                         | Incorrect diagnosis                                 | Patient experienced post-treatment distress/pain                                                 | Patient trip/fall                                             |
| Failure to take notes on a new episode                            | Investigation undertaken to detriment of patient    | Wrong positioning of patient during treatment                                                    | Patient unable to contact clinic in an emergency              |
| Failure to document diagnosis / prognosis                         | Significant pathology missed                        | Patient experienced significant post treatment effects e.g. neurological problem, disc prolapsed | Equipment malfunction                                         |
| Patient record misplaced                                          | Case history inadequate, missed secondary condition | Patient experienced negative effects during treatment e.g. fractured rib or clavicle             | Failure to use equipment appropriately                        |
| Records confused, treated wrong patient                           | Over-exposure of film                               | Suggested drugs to patient which had adverse effect                                              | Health and Safety measures inadequate                         |
| Treated before referral notes arrived, missed significant finding | Over-exposure of patient                            | Did not modify treatment plan to take account of patient preferences or health needs             | Failure to dispose of sharps and clinical waste appropriately |
| Failure to gain consent                                           | Failure to request x-ray report                     | Slow to refer after patient did not respond to treatment                                         | Medical emergency inadequately handled                        |
| Breach of confidentiality                                         | X-ray misinterpretation                             | Did not discontinue treatment when appropriate to do so                                          | Exposure to blood                                             |
|                                                                   | Exposure of pregnant patient                        | Patient discharged without arranging future care                                                 | Exposure to harmful substances                                |
|                                                                   | Failure in referral process                         |                                                                                                  |                                                               |
